# Supplementary material for: Association between short-term ambient air pollutants and type 2 diabetes outpatient visits: a time series study in Lanzhou, China
Source: Royal Society of Chemistry journal article supplement (doi:10.1039/d3em00464c), 2024-01-01
Supplement: d3em00464c1.pdf [file d3em00464c1.pdf]

## Supplemental Materials

### **Association between short-term ambient air pollutant and type 2 diabetes outpatient visits: A time series study in Lanzhou, China**

Yilin Ye<sup>a</sup>, Hongran Ma<sup>a</sup>, Jiyuan Dong<sup>a\*</sup>, Jiancheng Wang<sup>b</sup>

*<sup>a</sup>School of Public Health, Lanzhou University Lanzhou730000, People's Republic of  
China*

*<sup>b</sup>Gansu Health Vocational College, Lanzhou 730050, People's Republic of China*

## Table of Contents

**Figure S1.** Locations of Lanzhou city in China.

**Table S1.** RR and 95% CI of T2DM outpatient visits associated with 10  $\mu\text{g}/\text{m}^3$  increases in  $\text{PM}_{2.5}$ ,  $\text{PM}_{10}$ ,  $\text{SO}_2$ ,  $\text{NO}_2$ ,  $\text{O}_3$ 8h and 1  $\text{mg}/\text{m}^3$  CO from single-pollutant and two-pollutant models

**Table S2.** Association between outpatient visits for T2DM and ambient air pollutants: sensitivity varying controls in the regression time spline

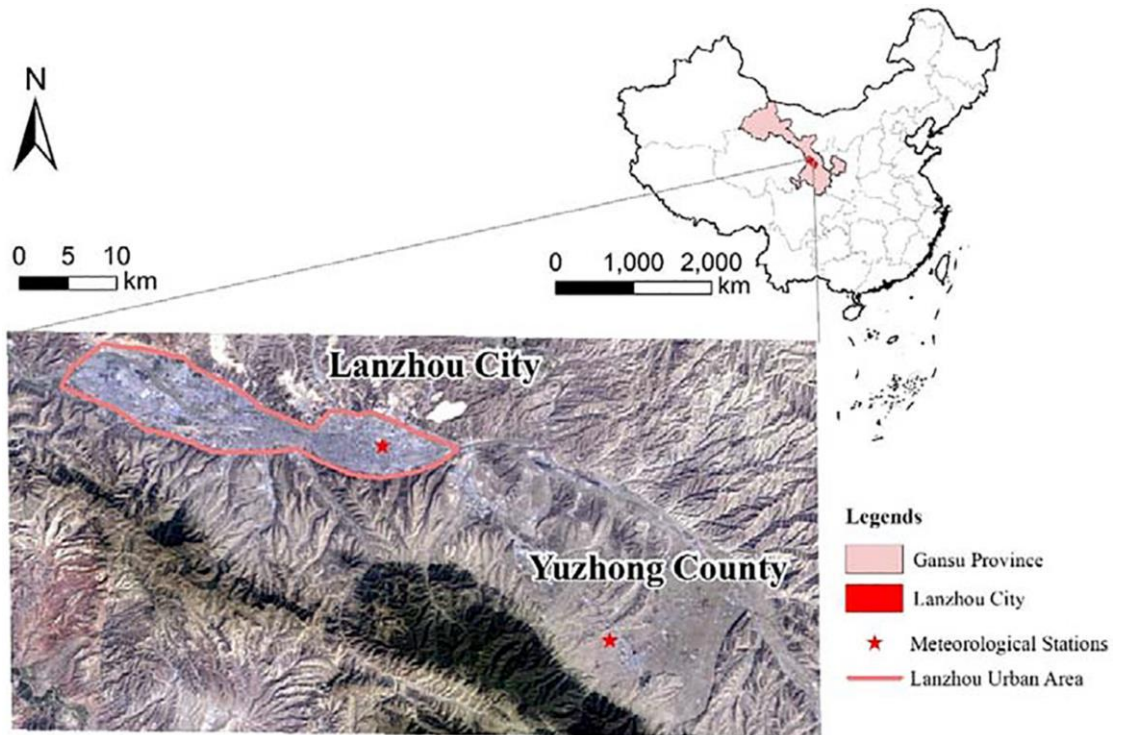

Figure S1 Locations of Lanzhou city in China

The pictures were downloaded from the following article, and also cited from Cheng et al., 2020. [Cheng, X., Lan, T., Mao, R., Gong, D. Y., Han, H. & Liu, X. (2020). Reducing air pollution increases the local diurnal temperature range: A case study of Lanzhou, China. *Meteorological Applications*, 27. <https://doi.org/10.1002/met.1939>].

Table S1 RR and 95% CI of T2DM outpatient visits associated with 10  $\mu\text{g}/\text{m}^3$  increases in  $\text{PM}_{2.5}$ ,  $\text{PM}_{10}$ ,  $\text{SO}_2$ ,  $\text{NO}_2$ ,  $\text{O}_3$ 8h and 1  $\text{mg}/\text{m}^3$  CO from single-pollutant and two-pollutant models

|                                | $\text{PM}_{2.5}$ at lag06 days | $\text{PM}_{10}$ at lag06 days | $\text{SO}_2$ at lag03 days | $\text{NO}_2$ at lag03 days | $\text{O}_3$ 8h at lag05 days | CO at lag03 days   |
|--------------------------------|---------------------------------|--------------------------------|-----------------------------|-----------------------------|-------------------------------|--------------------|
| Single-pollutant models        | 1.013(1.001,1.027)              | 1.002(0.998,1.006)             | 1.020(0.990,1.051)          | 1.034(1.018,1.050)          | 1.012(1.001,1.023)            | 1.084(1.029,1.142) |
| Adjusted for $\text{PM}_{2.5}$ | --                              | --                             | 1.015(0.983,1.048)          | 1.036(1.019,1.053)          | 1.010(1.001,1.023)            | 1.092(1.028,1.160) |
| Adjusted for $\text{PM}_{10}$  | --                              | --                             | 1.030(0.992,1.070)          | 1.034(1.014,1.053)          | 1.016(1.002,1.030)            | 1.090(1.021,1.168) |
| Adjusted for $\text{SO}_2$     | 1.016(1.004,1.031)              | 1.002(0.999,1.006)             | --                          | 1.040(1.014,1.071)          | 1.011(1.001,1.023)            | 1.102(1.053,1.238) |
| Adjusted for $\text{NO}_2$     | 1.020(1.003,1.039)              | 1.004(0.999,1.008)             | 1.025(0.992,1.065)          | --                          | 1.012(1.002,1.022)            | 1.077(1.021,1.101) |
| Adjusted for $\text{O}_3$ 8h   | 1.017(1.001,1.031)              | 1.003(0.999,1.007)             | 1.014(0.984,1.046)          | 1.033(1.017,1.050)          | --                            | 1.088(1.032,1.147) |
| Adjusted for CO                | 1.013(1.002,1.029)              | 1.002(0.998,1.005)             | 1.012(0.918,1.058)          | 1.043(1.016,1.064)          | 1.015(1.001,1.023)            | --                 |

Table S2 Association between outpatient visits for T2DM and ambient air pollutants: sensitivity varying controls in the regression time spline

|                         | PM <sub>2.5</sub> at lag06 days | PM <sub>10</sub> at lag06 days | SO <sub>2</sub> at lag03 days | NO <sub>2</sub> at lag03 days | O <sub>3</sub> 8h at lag05 days | CO <sup>a</sup> at lag03 days |
|-------------------------|---------------------------------|--------------------------------|-------------------------------|-------------------------------|---------------------------------|-------------------------------|
| df=6 per year for time  | 1.010(1.001,1.027)              | 1.004(0.994,1.009)             | 1.017(0.991,1.049)            | 1.037(1.018,1.056)            | 1.010(1.001,1.023)              | 1.080(1.021,1.140)            |
| df=7 per year for time  | 1.013(1.001,1.027)              | 1.002(0.998,1.006)             | 1.020(0.990,1.051)            | 1.034(1.018,1.050)            | 1.012(1.001,1.023)              | 1.084(1.029,1.142)            |
| df=8 per year for time  | 1.013(1.002,1.027)              | 1.003(0.999,1.007)             | 1.014(0.989,1.057)            | 1.030(1.010,1.061)            | 1.013(1.001,1.024)              | 1.085(1.026,1.144)            |
| df=9 per year for time  | 1.012(1.003,1.025)              | 1.001(0.995,1.005)             | 1.025(0.994,1.066)            | 1.029(1.012,1.054)            | 1.016(1.002,1.029)              | 1.082(1.025,1.141)            |
| df=10 per year for time | 1.014(1.001,1.028)              | 1.004(0.997,1.008)             | 1.029(0.998,1.090)            | 1.033(1.017,1.049)            | 1.020(1.001,1.031)              | 1.080(1.024,1.143)            |

Note. <sup>a</sup> except CO, CO Units: 1mg/m<sup>3</sup> increase in CO
